# Supplementary material for: Radiotherapy-induced diffuse myocardial fibrosis in early-stage breast cancer patients – multimodality imaging study with six-year follow-up
Source: PubMed Central journal article supplement (PMC10373367; doi:10.1186/s13014-023-02319-z), 2023-07-26
Supplement: 13014_2023_2319_MOESM2_ESM.pdf [file 13014_2023_2319_MOESM2_ESM.pdf]

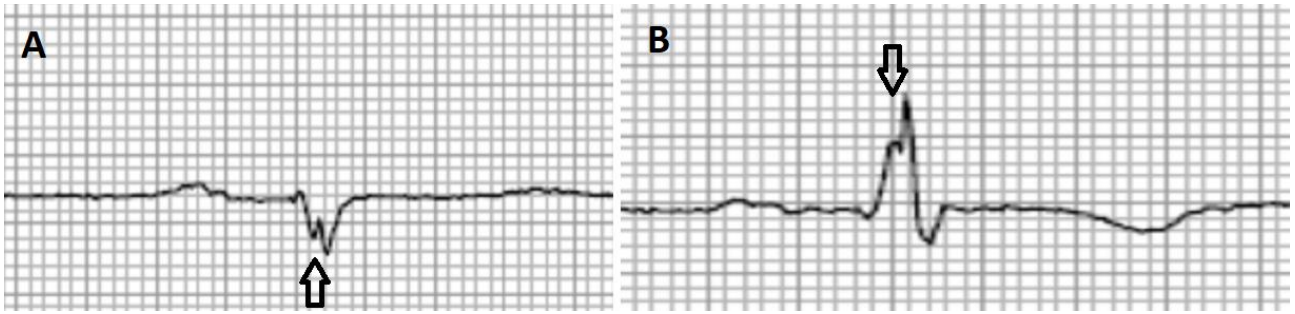

Figure S2. Fragmented QRS analysis example. A clear notch in any part of the QRS complex was registered, marked with an open arrow in the descending (A) and ascending (B) parts of the QRS complex.
