# Supplementary material for: Radiotherapy-induced diffuse myocardial fibrosis in early-stage breast cancer patients – multimodality imaging study with six-year follow-up
Source: PubMed Central journal article supplement (PMC10373367; doi:10.1186/s13014-023-02319-z), 2023-07-26
Supplement: 13014_2023_2319_MOESM4_ESM.pdf [file 13014_2023_2319_MOESM4_ESM.pdf]

**Table S1. Mean and maximal radiation doses of left ventricle segments.**

| Left ventricle segment | Radiation dose (Gy) |                     |
|------------------------|---------------------|---------------------|
|                        | Mean                | Max                 |
| Basal anterior         | 2.74 (2.33–3.57)    | 5.07 (3.88–7.36)    |
| Basal anteroseptal     | 1.81(1.38–2.18)     | 3.27 (2.58–4.04)    |
| Basal inferoseptal     | 0.97 (0.76–1.25)    | 1.63 (1.19–1.95)    |
| Basal inferior         | 0.81 (0.62–1.06)    | 1.17 (0.87–1.47)    |
| Basal inferolateral    | 1.31 (1.07–1.62)    | 2.08 (1.84–2.90)    |
| Basal anterolateral    | 2.17 (1.95–2.84)    | 3.85 (3.32–5.03)    |
| Mid anterior           | 9.18 (4.97–15.70)   | 38.57 (24.39–44.56) |
| Mid anteroseptal       | 3.22 (2.19–5.08)    | 21.45 (5.40–37.84)  |
| Mid inferoseptal       | 1.49 (1.01–2.03)    | 2.68 (1.70–3.16)    |
| Mid inferior           | 1.25 (0.92–1.80)    | 1.96 (1.42–2.74)    |
| Mid inferolateral      | 2.05 (1.55–2.55)    | 4.02 (2.79–6.15)    |
| Mid anterolateral      | 4.23 (3.08–7.72)    | 23.55 (7.75–36.91)  |
| Apical anterior        | 29.51 (12.59–38.88) | 45.43 (38.92–47.30) |
| Apical septal          | 9.33 (4.02–18.52)   | 37.23 (18.39–44.61) |
| Apical inferior        | 6.51 (2.72–10.63)   | 13.30 (9.56–25.47)  |
| Apical lateral         | 13.73 (4.43–26.02)  | 41.01 (26.15–45.64) |
| <b>p</b>               | <b>&lt;0.001</b>    | <b>&lt;0.001</b>    |

Values are median (Q<sub>1</sub>-Q<sub>3</sub>). Gy, gray; p, p-value from Friedmans test testing the difference of radiation dose between different left ventricle segments. Statistical significance is shown in bold (p < 0.05).
