# Supplementary material for: Radiotherapy-induced diffuse myocardial fibrosis in early-stage breast cancer patients – multimodality imaging study with six-year follow-up
Source: PubMed Central journal article supplement (PMC10373367; doi:10.1186/s13014-023-02319-z), 2023-07-26
Supplement: 13014_2023_2319_MOESM5_ESM.pdf [file 13014_2023_2319_MOESM5_ESM.pdf]

**Table S2. Left ventricle segmental T1, T2, ECV, and IBS values.**

|                     | T1<br>ms         | T2<br>ms            | ECV<br>%         | IBS<br>dB        |
|---------------------|------------------|---------------------|------------------|------------------|
| Basal anterior      | 1194 (1162–1230) | 35.30 (33.40–37.20) | 25.1 (23.3–27.1) | 1.05 (5.15)      |
| Basal anteroseptal  | 1228 (1195–1312) | 35.30 (34.30–37.70) | 28.2 (26.6–30.5) | 1.54 (6.60)      |
| Basal inferoseptal  | 1222 (1207–1275) | 36.40 (34.55–40.10) | 28.5 (26.3–31.2) | 3.64 (6.24)      |
| Basal inferior      | 1255 (1219–1323) | 35.30 (33.55–38.20) | 27.6 (26.3–31.9) | 1.10 (4.60)      |
| Basal inferolateral | 1210 (1157–1283) | 34.90 (34.05–36.60) | 27.5 (25.8–28.9) | 1.90 (4.05)      |
| Basal anterolateral | 1187 (1156–1254) | 34.50 (33.35–36.55) | 25.5 (23.1–26.8) | 2.55 (5.71)      |
| Mid anterior        | 1176 (1117–1236) | 35.20 (34.15–38.10) | 25.5 (22.7–28.7) | 0.15 (4.88)      |
| Mid anteroseptal    | 1243 (1189–1351) | 36.20 (33.30–39.00) | 27.3 (25.9–29.9) | 0.92 (5.28)      |
| Mid inferoseptal    | 1231 (1184–1311) | 34.60 (33.55–37.20) | 27.5 (24.0–31.4) | 2.53 (6.14)      |
| Mid inferior        | 1227 (1179–1271) | 34.20 (32.70–35.80) | 26.9 (24.8–29.1) | -1.62 (6.43)     |
| Mid inferolateral   | 1193 (1147–1273) | 34.00 (33.35–36.30) | 27.0 (24.3–28.9) | 2.49 (3.73)      |
| Mid anterolateral   | 1192 (1152–1268) | 35.30 (33.90–37.55) | 25.6 (23.5–28.4) | 2.21 (5.52)      |
| Apical anterior     | 1236 (1128–1329) | 37.90 (36.00–40.80) | 27.9 (25.3–33.7) | -1.56 (4.94)     |
| Apical septal       | 1248 (1206–1327) | 36.80 (34.25–43.10) | 29.4 (27.4–34.1) | 0.03 (7.52)      |
| Apical inferior     | 1245 (1173–1337) | 34.20 (33.00–37.35) | 28.3 (25.9–33.6) | -1.26 (5.89)     |
| Apical lateral      | 1221 (1127–1312) | 37.20 (34.05–43.00) | 28.7 (25.8–32.2) | -1.63 (4.67)     |
| p-value             | <b>&lt;0.001</b> | <b>&lt;0.001</b>    | <b>&lt;0.001</b> | <b>&lt;0.001</b> |

Values are median (Q<sub>1</sub>-Q<sub>3</sub>) for T1, T2 and ECV, and mean (SD) for IBS. Three to twelve patients' IBS values per segment were missing and could not be evaluated. One patient's segmental T2 values were missing and could not be evaluated. ECV, extracellular volume; IBS, integrated backscatter, change from baseline to six-year follow-up visit; dB, decibel; p, p-value from Friedmans test testing the difference between different left ventricle segments. Statistical significance is shown in bold (p < 0.05).
